# Supplementary material for: Large-scale prediction of Saccharomyces cerevisiae gene function using overlapping transcriptional clusters
Source: Springer Nature journal article supplement (doi:10.1038/ng906), 2002-06-24
Supplement: ng906-S2.pdf [file ng906-S2.pdf]

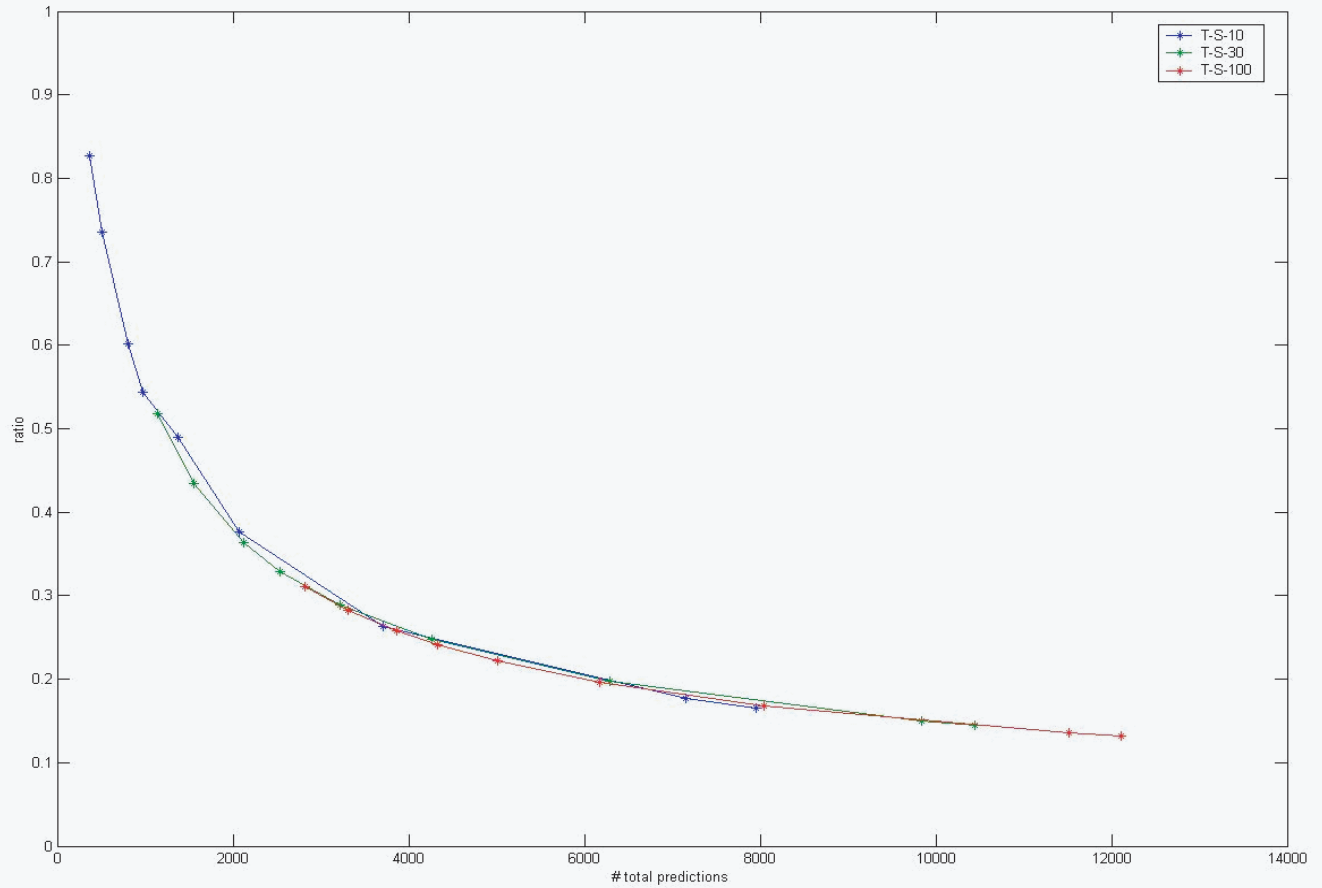

### Supplemental Fig. B

Selecting cluster size cutoffs for top-N clusters for the augmented data set. Size cutoffs are represented by color (N less than or equal to 10 (blue line), 30 (green line), 100 (red line)). Correlation cutoff was held at 0.5 and P values were modulated between 0 and 1 to form curves. Top-10 was used for subsequent analysis.
